# Supplementary material for: The Blood of the HIV-Infected Patients Contains κ-IgG, λ-IgG, and Bispecific κλ-IgG, Which Possess DNase and Amylolytic Activity
Source: MDPI journal article supplement (doi:10.3390/life12020304), 2022-02-17

**Table S1.** Double sandwich ELISA of affinity isolated IgG subfractions ( $\kappa\kappa$ -IgG,  $\lambda\lambda$ -IgG,  $\kappa\lambda$ -IgG). Primary antibodies - anti-kappa-light chains and anti-lambda-light chains. Detection with anti-kappa and anti-lambda conjugates with horseradish peroxidase. Data series of three independent experiments is presented in the Table 1. The experimental error did not exceed 5%.

| Primary Antibody        | Detection Antibody          | A <sub>450</sub> Values |                       |                      |
|-------------------------|-----------------------------|-------------------------|-----------------------|----------------------|
|                         |                             | $\kappa\kappa$ -IgG     | $\lambda\lambda$ -IgG | $\kappa\lambda$ -IgG |
| anti-kappa-light chain  | anti-kappa-light chain HRP  | 1,415                   | 0,053                 | 0,069                |
|                         | anti-lambda-light chain HRP | 0,043                   | 0,046                 | 1,100                |
| anti-lambda-light chain | anti-lambda-light chain HRP | 0,044                   | 1,452                 | 0,081                |
|                         | anti-kappa-light chain HRP  | 0,037                   | 0,049                 | 1,298                |

**Table S2.** Ratio of subclasses in IgG preparations isolated from the blood of HIV-infected donors. The analysis was performed by double sandwich ELISA. Primary anti-IgG1-IgG4 antibodies were sorbed in 96-wells ELISA plate. Detection was carried out using anti-IgG-HRP conjugates. Data from a series of three independent experiments are presented in the table; the experimental error did not exceed 5%.

| Donor ID | IgG1, % | IgG2, % | IgG3, % | IgG4, % |
|----------|---------|---------|---------|---------|
| 4        | 42.3    | 34.2    | 16.3    | 7.1     |
| 27       | 29.7    | 51.8    | 12.7    | 5.9     |
| 41       | 52.8    | 34.2    | 9.9     | 3.1     |
| 96       | 36.6    | 46.0    | 11.6    | 5.8     |
| 101      | 41.2    | 40.0    | 11.5    | 7.3     |
| 116      | 45.7    | 38.5    | 9.9     | 5.9     |
| 120      | 45.3    | 38.2    | 13.1    | 3.5     |
| 134      | 49.5    | 30.4    | 12.5    | 7.6     |
| 138      | 34.5    | 45.4    | 14.9    | 5.2     |
| 142      | 32.1    | 50.1    | 15.5    | 2.4     |
| 144      | 35.3    | 49.9    | 11.5    | 3.3     |
| 145      | 32.3    | 47.6    | 14.0    | 6.2     |
| 3        | 39.0    | 41.5    | 12.5    | 7.0     |
| 20       | 57.2    | 26.3    | 13.9    | 2.6     |
| 32       | 57.6    | 30.3    | 8.2     | 3.9     |
| 39       | 59.9    | 18.1    | 12.9    | 9.1     |
| 55       | 43.8    | 37.8    | 13.3    | 5.2     |
| 92       | 35.2    | 44.8    | 15.0    | 5.0     |
| 99       | 49.3    | 30.0    | 15.6    | 5.2     |
| 114      | 60.5    | 21.7    | 13.7    | 4.0     |
| 118      | 41.0    | 42.9    | 10.5    | 5.6     |
| 123      | 38.0    | 44.9    | 11.9    | 5.2     |
| 126      | 38.1    | 46.4    | 12.4    | 3.1     |
| 137      | 59.5    | 20.5    | 12.4    | 7.5     |
| 140      | 35.4    | 45.0    | 15.7    | 3.9     |
| 98       | 41.5    | 39.9    | 11.0    | 7.7     |

**Table S3.** ELISA analysis of IgG subclasses in subfractions of  $\lambda\lambda$ -IgG,  $\kappa\kappa$ -IgG,  $\kappa\lambda$ -IgG isolated from the blood of HIV-infected donors. The analysis was performed by double sandwich ELISA as in Table S2.

|                       | IgG1, % | IgG2, % | IgG3, % | IgG4, % |
|-----------------------|---------|---------|---------|---------|
| $\kappa\kappa$ -IgG   | 55,8    | 34,2    | 7,4     | 2,6     |
| $\lambda\lambda$ -IgG | 57,1    | 35,5    | 5       | 2,3     |
| $\kappa\lambda$ -IgG  | 37,1    | 51,5    | 7,5     | 3,9     |

**Table S4.** Relative catalytic activities of IgG preparations isolated from the blood plasma of 26 HIV-infected patients. Hydrolysis of plasmid DNA pBluescript (final concentration 9.6 µg/ml) and maltoheptaose (final concentration 5.0 mM) by individual IgG preparations. Incubation for 24 h at 37 °C. Data from a series of three independent experiments presented in Table, the experimental error did not exceed 5%.

| Donor ID | DNase Activity, % | Amylolytic Activity, % |
|----------|-------------------|------------------------|
| 3        | 10.6              | 9.4                    |
| 20       | 10.5              | 3.1                    |
| 32       | 8.9               | 3.6                    |
| 39       | 11.8              | 3.2                    |
| 55       | 16.7              | 6.1                    |
| 92       | 8.1               | 7.8                    |
| 98       | 5.4               | 5.7                    |
| 99       | 8.8               | 0.2                    |
| 114      | 10.4              | 6.3                    |
| 118      | 12.2              | 5.3                    |
| 123      | 8.6               | 6.8                    |
| 126      | 8.7               | 3.0                    |
| 137      | 6.9               | 4.1                    |
| 138      | 9.7               | 0.0                    |
| 140      | 6.1               | 2.5                    |
| 142      | 8.4               | 2.1                    |
| 144      | 8.7               | 1.6                    |
| 145      | 6.8               | 2.5                    |
| 4        | 2.6               | 10.7                   |
| 27       | 9.2               | 3.8                    |
| 41       | 10.9              | 7.0                    |
| 96       | 7.3               | 4.8                    |
| 101      | 6.8               | 11.7                   |
| 116      | 9.2               | 7.1                    |
| 120      | 9.2               | 3.2                    |
| 134      | 9.4               | 4.4                    |

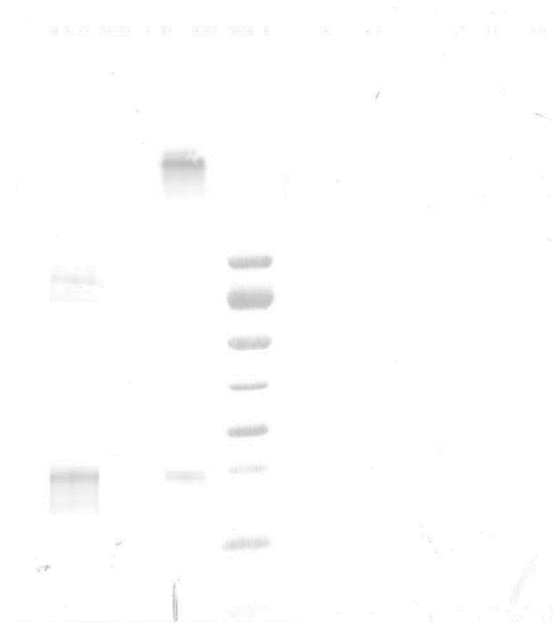

**Figure S1.** Original images for Figure 1.

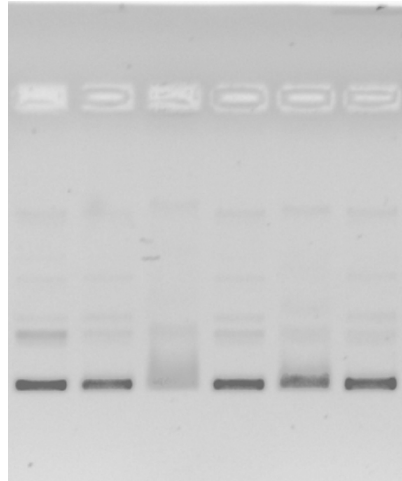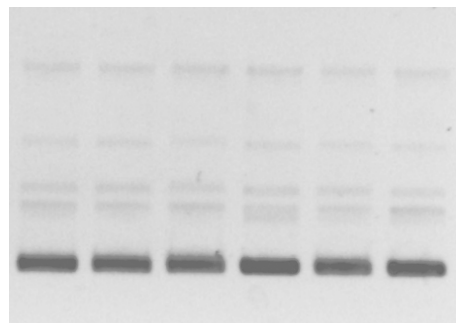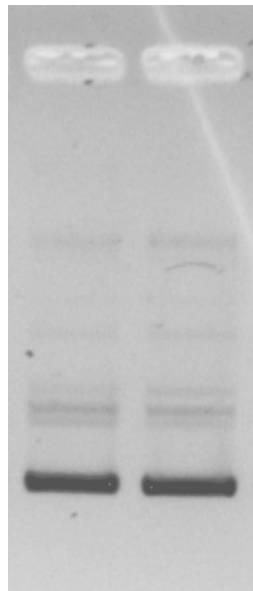

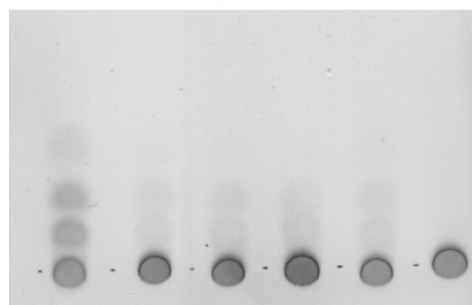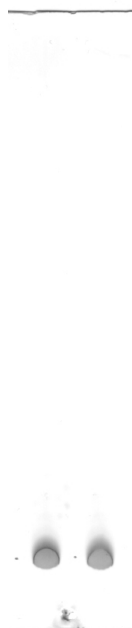

**Figure S2.** Original images for Figure 5.

Original images for **Figure 6**

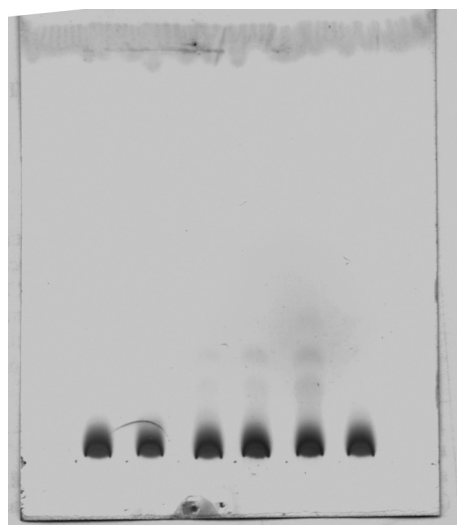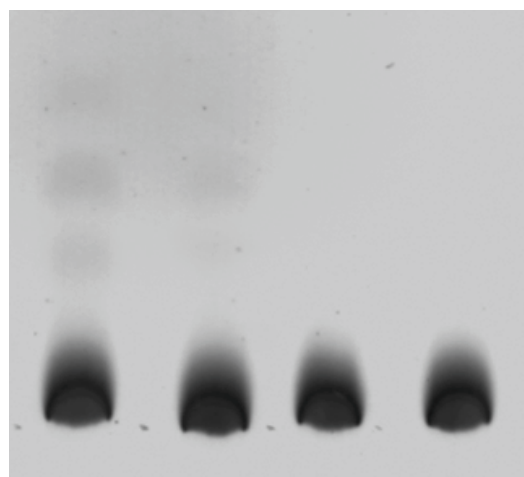



Original images for **Figure 8**

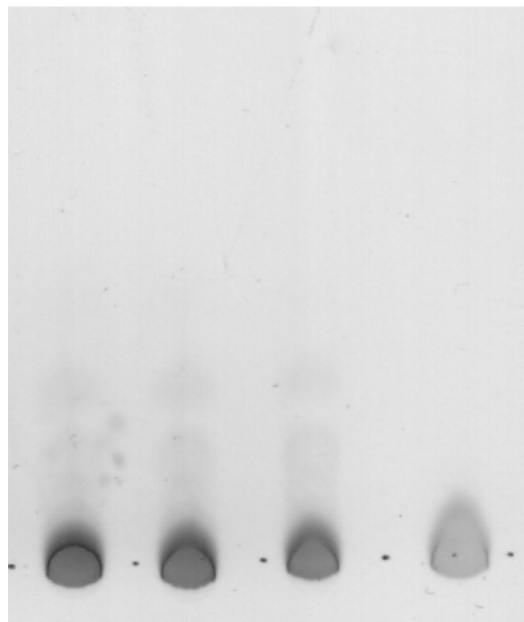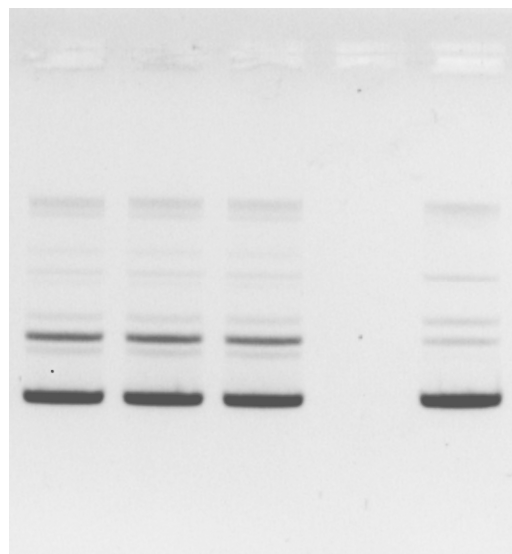

Supplement: s1 [file s1]
